# Supplementary material for: First Description of Akanthomyces uredinophilus comb. nov. from Hemipteran Insects in America
Source: MDPI journal article supplement (doi:10.3390/d14121118), 2022-12-15
Supplement: s1 [file s1]

**Table S3:** Pair-wise p-distance values for aligned LSU marker sequences.

| Genus, species, type strain / isolate designations                    |       |       |       |       |       |       |       |       |       |       |       |       |       |       |       |       |       |       |       |       |       |       |       |       |      |
|-----------------------------------------------------------------------|-------|-------|-------|-------|-------|-------|-------|-------|-------|-------|-------|-------|-------|-------|-------|-------|-------|-------|-------|-------|-------|-------|-------|-------|------|
| (1) Isolate CEP 054                                                   |       |       |       |       |       |       |       |       |       |       |       |       |       |       |       |       |       |       |       |       |       |       |       |       |      |
| (2) Isolate CEP 057                                                   | 0,000 |       |       |       |       |       |       |       |       |       |       |       |       |       |       |       |       |       |       |       |       |       |       |       |      |
| (3) Isolate CEP 108                                                   | 0,001 | 0,001 |       |       |       |       |       |       |       |       |       |       |       |       |       |       |       |       |       |       |       |       |       |       |      |
| (4) <i>Lecanicillium uredinophilum</i> TYPE KACC 44082                | 0,000 | 0,000 | 0,001 |       |       |       |       |       |       |       |       |       |       |       |       |       |       |       |       |       |       |       |       |       |      |
| (5) <i>Lecanicillium uredinophilum</i> KUN 101466                     | 0,000 | 0,000 | 0,001 | 0,000 |       |       |       |       |       |       |       |       |       |       |       |       |       |       |       |       |       |       |       |       |      |
| (6) <i>Lecanicillium uredinophilum</i> QHLA                           | 0,000 | 0,000 | 0,001 | 0,000 | 0,000 |       |       |       |       |       |       |       |       |       |       |       |       |       |       |       |       |       |       |       |      |
| (7) " <i>Lecanicillium</i> sp." / " <i>L. zaquensis</i> " HMAS 246917 | 0,001 | 0,001 | 0,002 | 0,001 | 0,001 | 0,001 |       |       |       |       |       |       |       |       |       |       |       |       |       |       |       |       |       |       |      |
| (8) <i>Akanthomyces lecanii</i> TYPE CBS 101247                       | 0,011 | 0,011 | 0,012 | 0,011 | 0,011 | 0,011 | 0,012 |       |       |       |       |       |       |       |       |       |       |       |       |       |       |       |       |       |      |
| (9) <i>Akanthomyces sabanensis</i> TYPE ANDES-F 1024                  | 0,011 | 0,011 | 0,012 | 0,011 | 0,011 | 0,011 | 0,012 | 0,004 |       |       |       |       |       |       |       |       |       |       |       |       |       |       |       |       |      |
| (10) <i>Akanthomyces dipterigenus</i> TYPE CBS 126.27                 | 0,010 | 0,010 | 0,011 | 0,010 | 0,010 | 0,010 | 0,011 | 0,010 | 0,009 |       |       |       |       |       |       |       |       |       |       |       |       |       |       |       |      |
| (11) <i>Akanthomyces attenuatus</i> TYPE CBS 170.76                   | 0,002 | 0,002 | 0,004 | 0,002 | 0,003 | 0,002 | 0,004 | 0,011 | 0,011 | 0,010 |       |       |       |       |       |       |       |       |       |       |       |       |       |       |      |
| (12) <i>Akanthomyces muscarius</i> TYPE CBS 143.62                    | 0,002 | 0,002 | 0,004 | 0,002 | 0,003 | 0,002 | 0,004 | 0,011 | 0,011 | 0,010 | 0,000 |       |       |       |       |       |       |       |       |       |       |       |       |       |      |
| (13) <i>Akanthomyces pissodis</i> TYPE CBS 118231                     | 0,002 | 0,002 | 0,004 | 0,002 | 0,003 | 0,002 | 0,004 | 0,011 | 0,011 | 0,010 | 0,000 | 0,000 |       |       |       |       |       |       |       |       |       |       |       |       |      |
| (14) <i>Akanthomyces farinosa</i> TYPE CBS 541.81                     | 0,015 | 0,015 | 0,016 | 0,015 | 0,015 | 0,015 | 0,016 | 0,017 | 0,018 | 0,010 | 0,015 | 0,015 | 0,015 |       |       |       |       |       |       |       |       |       |       |       |      |
| (15) <i>Akanthomyces coccidioperitheciatus</i> NHJ 6709               | 0,016 | 0,016 | 0,018 | 0,016 | 0,016 | 0,016 | 0,018 | 0,016 | 0,019 | 0,011 | 0,016 | 0,016 | 0,016 | 0,004 |       |       |       |       |       |       |       |       |       |       |      |
| (16) <i>Akanthomyces kanyawimiae</i> TBRC 7242                        | 0,016 | 0,016 | 0,018 | 0,016 | 0,017 | 0,016 | 0,018 | 0,016 | 0,019 | 0,011 | 0,016 | 0,016 | 0,016 | 0,004 | 0,000 |       |       |       |       |       |       |       |       |       |      |
| (17) <i>Akanthomyces noctuidarum</i> TYPE BCC36265                    | 0,038 | 0,038 | 0,039 | 0,038 | 0,039 | 0,038 | 0,039 | 0,031 | 0,035 | 0,028 | 0,038 | 0,038 | 0,038 | 0,031 | 0,030 | 0,030 |       |       |       |       |       |       |       |       |      |
| (18) <i>Akanthomyces pyralidarum</i> TYPE BCC28816                    | 0,031 | 0,031 | 0,032 | 0,031 | 0,032 | 0,031 | 0,032 | 0,028 | 0,030 | 0,022 | 0,031 | 0,031 | 0,031 | 0,023 | 0,025 | 0,025 | 0,026 |       |       |       |       |       |       |       |      |
| (19) <i>Akanthomyces tortricidarum</i> TYPE BCC72638                  | 0,018 | 0,018 | 0,020 | 0,018 | 0,019 | 0,018 | 0,020 | 0,017 | 0,018 | 0,013 | 0,018 | 0,018 | 0,018 | 0,013 | 0,015 | 0,015 | 0,029 | 0,017 |       |       |       |       |       |       |      |
| (20) <i>Akanthomyces sulphureus</i> TYPE TBRC 7248                    | 0,021 | 0,021 | 0,023 | 0,021 | 0,022 | 0,021 | 0,023 | 0,023 | 0,024 | 0,018 | 0,021 | 0,021 | 0,021 | 0,019 | 0,021 | 0,020 | 0,036 | 0,025 | 0,020 |       |       |       |       |       |      |
| (21) <i>Akanthomyces tuberculatus</i> OSC 111002                      | 0,014 | 0,014 | 0,016 | 0,014 | 0,014 | 0,014 | 0,016 | 0,017 | 0,016 | 0,008 | 0,014 | 0,014 | 0,014 | 0,014 | 0,016 | 0,016 | 0,041 | 0,027 | 0,013 | 0,020 |       |       |       |       |      |
| (22) <i>Akanthomyces waltergamsii</i> TYPE TBRC 7252                  | 0,019 | 0,019 | 0,020 | 0,019 | 0,019 | 0,019 | 0,020 | 0,020 | 0,021 | 0,013 | 0,019 | 0,019 | 0,019 | 0,014 | 0,016 | 0,015 | 0,034 | 0,023 | 0,015 | 0,005 | 0,014 |       |       |       |      |
| (23) <i>Akanthomyces_ aculeatus</i> TYPE HUA 186145                   | 0,015 | 0,015 | 0,016 | 0,015 | 0,015 | 0,015 | 0,016 | 0,016 | 0,015 | 0,007 | 0,015 | 0,015 | 0,015 | 0,012 | 0,013 | 0,013 | 0,035 | 0,024 | 0,013 | 0,022 | 0,011 | 0,016 |       |       |      |
| (24) <i>Samsoniella alboaurantia</i> TYPE CBS 240.32                  | 0,005 | 0,005 | 0,006 | 0,005 | 0,005 | 0,005 | 0,006 | 0,009 | 0,008 | 0,010 | 0,007 | 0,007 | 0,007 | 0,015 | 0,016 | 0,016 | 0,035 | 0,031 | 0,016 | 0,021 | 0,016 | 0,019 | 0,015 |       |      |
| (25) <i>Beauveria bassiana</i> ARSEF 2991                             | 0,021 | 0,021 | 0,022 | 0,021 | 0,021 | 0,021 | 0,022 | 0,024 | 0,026 | 0,021 | 0,021 | 0,021 | 0,021 | 0,023 | 0,023 | 0,023 | 0,044 | 0,035 | 0,027 | 0,029 | 0,024 | 0,026 | 0,030 | 0,023 |      |
|                                                                       | (1)   | (2)   | (3)   | (4)   | (5)   | (6)   | (7)   | (8)   | (9)   | (10)  | (11)  | (12)  | (13)  | (14)  | (15)  | (16)  | (17)  | (18)  | (19)  | (20)  | (21)  | (22)  | (23)  | (24)  | (25) |
