# Supplementary material for: First Description of Akanthomyces uredinophilus comb. nov. from Hemipteran Insects in America
Source: MDPI journal article supplement (doi:10.3390/d14121118), 2022-12-15
Supplement: s1 [file s1]

**Table S1:** Fungal strains and marker gene sequences used in this study.

| Genus, species                                                   | Strain / type material | ITS      | EF1A     | RPB1     | RPB2     | LSU      | geographic origin | isolation source / natural host                    |
|------------------------------------------------------------------|------------------------|----------|----------|----------|----------|----------|-------------------|----------------------------------------------------|
| <i>Akanthomyces uredinophilus</i>                                | CEP 054 (ARSEF 7460)   | MH013232 | MH062184 | OP762608 | OP762612 | OP752150 | Argentina         | <i>Trialeurodes vaporariorum</i> (Hemiptera)       |
| <i>Akanthomyces uredinophilus</i>                                | CEP 057 (ARSEF 7207)   | MH013506 | MH062186 | OP762609 | OP762613 | OP752151 | Argentina         | <i>Trialeurodes vaporariorum</i> (Hemiptera)       |
| <i>Akanthomyces uredinophilus</i>                                | CEP 108 (ARSEF 7462)   | MH013508 | MH062188 | OP762610 | OP762614 | OP752152 | Argentina         | <i>Myzus persicae</i> (Hemiptera)                  |
| <i>Lecanicillium uredinophilum</i>                               | KACC 44066             | n.a      | KM283808 | KM283830 | KM283850 | KM283784 | Korea             | <i>Pucciniastrum agrimoniae</i> (Pucciniastraceae) |
| <i>Lecanicillium uredinophilum</i>                               | KACC 44082 TYPE        | n.a      | KM283806 | KM283828 | KM283848 | KM283782 | Korea             | <i>Pucciniastrum agrimoniae</i> (Pucciniastraceae) |
| <i>Lecanicillium uredinophilum</i>                               | KACC 47756             | n.a      | KM283807 | KM283829 | KM283849 | KM283783 | Korea             | <i>Pucciniastrum agrimoniae</i> (Pucciniastraceae) |
| <i>Lecanicillium uredinophilum</i>                               | KUN 101466             | MG948305 | MG948315 | MG948311 | MG948313 | MG948307 | China             | undetermined insect                                |
| <i>Lecanicillium uredinophilum</i>                               | KUN 101469             | MG948306 | MG948316 | MG948312 | MG948314 | MG948308 | China             | undetermined insect                                |
| <i>Lecanicillium uredinophilum</i>                               | QHLA                   | MZ768909 | n.a.     | ON107271 | ON107270 | MZ768916 | China             | Chinese caterpillar (Lepidoptera)                  |
| " <i>Lecanicillium</i> sp." / " <i>Lecanicillium zaquensis</i> " | HMAS 246917            | MT789698 | MT797811 | MT797809 | n.a.     | MT789696 | China             | Not determined                                     |
| <i>Akanthomyces lecanii</i>                                      | CBS 101247 TYPE        | JN049836 | DQ522359 | DQ522407 | DQ522466 | KM283794 | US                | <i>Coccus viridis</i> (Hemiptera)                  |
| <i>Akanthomyces lecanii</i>                                      | CBS 102067             | MH862778 | KM283818 | KM283838 | KM283860 | KM283795 | Indonesia         | <i>Coccus viridis</i> (Hemiptera)                  |
| <i>Akanthomyces attenuatus</i>                                   | CBS 170.76 TYPE        | MH872739 | OP762607 | OP762611 | OP762615 | OP752153 | Poland            | Carpocapsa (Lepidoptera)                           |
| <i>Akanthomyces attenuatus</i>                                   | CBS 402.78 REPLACETYPE | AJ292434 | EF468782 | EF468888 | EF468935 | AF339565 | UK                | Not determined                                     |
| <i>Akanthomyces muscarius</i>                                    | CBS 143.62 TYPE        | MH858126 | KM283821 | KM283841 | KM283863 | KM283798 | England           | <i>Trialeurodes vaporariorum</i> (Hemiptera)       |
| <i>Akanthomyces dipterigenus</i>                                 | CBS 126.27 TYPE        | OP756342 | KM283820 | KM283840 | KM283862 | KM283797 | Sri Lanka         | <i>Icerya purchasi</i> (Hemiptera)                 |
| <i>Akanthomyces dipterigenus</i>                                 | CBS 102072             | n.a.     | KM283819 | KM283839 | KM283861 | KM283796 | UK                | <i>Macrosiphoniella sanborni</i> (Hemiptera)       |
| <i>Akanthomyces pissodis</i>                                     | CBS 118231 TYPE        | n.a.     | KM283822 | KM283842 | KM283864 | KM283799 | Canada            | <i>Pissodes strobi</i> (Coleoptera)                |
| <i>Akanthomyces pissodis</i>                                     | BBC7                   | MT004829 | MT027503 | MT027506 | MT027509 | MT004835 | Croatia           | <i>Corythucha arcuata</i> (Hemiptera)              |
| <i>Akanthomyces sabanensis</i>                                   | ANDES-F 1024 TYPE      | KC633232 | KC633266 | n.a.     | KC633249 | KC875225 | Colombia          | <i>Parthenolecanium</i> sp. (Hemiptera)            |
| <i>Akanthomyces sabanensis</i>                                   | ANDES-F 1023           | KC633237 | KC633267 | KC875222 | n.a.     | n.a.     | Colombia          | <i>Parthenolecanium</i> sp. (Hemiptera)            |
| <i>Akanthomyces araneicola</i>                                   | GZAC GY29011 TYPE      | MK942431 | MK955950 | MK955944 | MK955947 | n.a.     | China             | Spider (Araneae)                                   |
| <i>Akanthomyces araneogenum</i>                                  | GZUIF SN1              | MH978177 | MH978188 | MH978183 | MH978186 | n.a.     | China             | Spider (Araneae)                                   |
| <i>Akanthomyces coccidioperitheciatus</i>                        | NHJ 6709               | JN049865 | EU369025 | EU369067 | EU369086 | EU369042 | n.a.              | Spider (Araneae)                                   |
| <i>Akanthomyces farinosa</i>                                     | CBS 541.81 TYPE        | AY624180 | MF416498 | MF416655 | MF416449 | MF416553 | Ecuador           | Spider (Araneae)                                   |
| <i>Akanthomyces kanyawimiae</i>                                  | TBRC 7242              | MF140751 | MF140838 | MF140784 | MF140808 | MF140718 | Thailand          | Spider (Araneae)                                   |
| <i>Akanthomyces lepidopterorum</i>                               | GZAC SD05151           | MT705971 | n.a.     | n.a.     | MT727044 | n.a.     | China             | Lepidoptera                                        |
| <i>Akanthomyces neocoleopterorum</i>                             | GZAC GY11241 TYPE      | MN093295 | MN097813 | MN097816 | MN097812 | n.a.     | China             | Ladybug (Coleoptera)                               |
| <i>Akanthomyces noctuidarum</i>                                  | BCC36265 TYPE          | MT356072 | MT477978 | MT477994 | MT477987 | MT356084 | Thailand          | Noctuidae (Lepidoptera)                            |
| <i>Akanthomyces pyralidarum</i>                                  | BCC28816 TYPE          | MT356080 | MT477982 | MT478000 | MT478007 | MT356091 | Thailand          | Pyralidae (Lepidoptera)                            |
| <i>Akanthomyces tortricidarum</i>                                | BCC72638 TYPE          | MT356076 | MT478004 | MT477997 | MT477992 | MT356088 | Thailand          | Tortricidae (Lepidoptera)                          |
| <i>Akanthomyces sulphureus</i>                                   | TBRC 7248 TYPE         | MF140758 | MF140843 | MF140787 | MF140812 | MF140722 | Thailand          | Spider (Araneae)                                   |
| <i>Akanthomyces thailandicus</i>                                 | TBRC 7245 TYPE         | MF140754 | MF140839 | n.a.     | MF140809 | n.a.     | Thailand          | Spider (Araneae)                                   |
| <i>Akanthomyces tuberculatus</i>                                 | OSC 111002             | JN049830 | DQ522338 | n.a.     | DQ522435 | DQ518767 | n.a.              | Lepidoptera                                        |
| <i>Akanthomyces waltergamsii</i>                                 | TBRC 7252 TYPE         | MF140748 | MF140834 | MF140782 | MF140806 | MF140714 | Thailand          | Spider (Araneae)                                   |
| <i>Akanthomyces aculeatus</i>                                    | HUA 186145 TYPE        | n.a.     | MF416465 | n.a.     | n.a.     | MF416520 | n.a.              | n.a.                                               |
| <i>Akanthomyces aculeatus</i>                                    | NTUCC 20-060           | MT974202 | MW200213 | MW200221 | MW200230 | MT974356 | Taiwan            | n.a.                                               |
| <i>Samsoniella alboaurantia</i>                                  | CBS 240.32 TYPE        | AY624178 | JF416019 | JN049895 | JF415999 | JF415979 | Netherlands       | Lepidoptera                                        |
| <i>Samsoniella aurantia</i>                                      | TBRC 7271 TYPE         | MF140764 | MF140846 | MF140791 | MF140818 | MF140728 | Thailand          | Lepidoptera                                        |
| <i>Samsoniella inthanonensis</i>                                 | TBRC 7915 TYPE         | MF140761 | MF140849 | MF140790 | MF140815 | MF140725 | Thailand          | Lepidoptera                                        |
| <i>Beauveria bassiana</i>                                        | ARSEF 1564 TYPE        | HQ880761 | HQ880974 | HQ880833 | HQ880905 | n.a.     | Italy             | <i>Hyphantria cunea</i> (Lepidoptera)              |
| <i>Beauveria bassiana</i>                                        | ARSEF 2991             | n.a.     | n.a.     | n.a.     | n.a.     | EU334676 | Canada            | <i>Leptinotarsa decemlineata</i> (Coleoptera)      |

n.a. = data not available
