# Supplementary material for: First Description of Akanthomyces uredinophilus comb. nov. from Hemipteran Insects in America
Source: MDPI journal article supplement (doi:10.3390/d14121118), 2022-12-15
Supplement: s1 [file s1]

**Table S2:** Pair-wise p-distance values for aligned ITS (lower left triangle) and EF1A-RPB1-RPB2 (upper right) marker sequences.

| Genus, species, type strain / isolate designations                  | (1)   | (2)   | (3)   | (4)   | (5)   | (6)   | (7)   | (8)   | (9)   | (10)  | (11)  | (12)  | (13)  | (14)  | (15)  | (16)  | (17)  | (18)  | (19)  | (20)  | (21)  | (22)  | (23)  | (24)  | (25)  | (26)  | (27)  | (28)  | (29)  | (30)  | EF1A-RPB1-RPB2 |      |
|---------------------------------------------------------------------|-------|-------|-------|-------|-------|-------|-------|-------|-------|-------|-------|-------|-------|-------|-------|-------|-------|-------|-------|-------|-------|-------|-------|-------|-------|-------|-------|-------|-------|-------|----------------|------|
| (1) Isolate CEP 054                                                 |       | 0,000 | 0,000 | 0,004 | 0,007 | 0,081 | 0,050 | 0,063 | 0,053 | 0,072 | 0,043 | 0,042 | 0,044 | 0,042 | n.a.  | 0,064 | 0,071 | 0,070 | 0,071 | 0,070 | 0,104 | 0,095 | 0,100 | 0,064 | 0,062 | 0,089 | 0,071 | 0,104 | 0,102 | 0,113 | (1)            |      |
| (2) Isolate CEP 057                                                 | 0,000 |       | 0,000 | 0,004 | 0,007 | 0,081 | 0,050 | 0,063 | 0,053 | 0,072 | 0,043 | 0,042 | 0,044 | 0,042 | n.a.  | 0,064 | 0,071 | 0,070 | 0,071 | 0,070 | 0,104 | 0,095 | 0,100 | 0,064 | 0,062 | 0,089 | 0,071 | 0,104 | 0,102 | 0,113 | (2)            |      |
| (3) Isolate CEP 108                                                 | 0,000 | 0,000 |       | 0,004 | 0,007 | 0,081 | 0,050 | 0,063 | 0,053 | 0,072 | 0,043 | 0,042 | 0,044 | 0,042 | n.a.  | 0,064 | 0,071 | 0,070 | 0,071 | 0,070 | 0,104 | 0,095 | 0,100 | 0,064 | 0,062 | 0,089 | 0,071 | 0,104 | 0,102 | 0,113 | (3)            |      |
| (4) <i>Lecanicillium uredinophilum</i> TYPE KACC 44082              | n.a.  | n.a.  | n.a.  |       | 0,005 | 0,080 | 0,049 | 0,062 | 0,054 | 0,071 | 0,044 | 0,043 | 0,044 | 0,042 | n.a.  | 0,063 | 0,071 | 0,070 | 0,070 | 0,069 | 0,103 | 0,093 | 0,097 | 0,065 | 0,063 | 0,089 | 0,070 | 0,102 | 0,101 | 0,112 | (4)            |      |
| (5) <i>Lecanicillium uredinophilum</i> KUN 101466                   | 0,002 | 0,002 | 0,002 | n.a.  |       | 0,080 | 0,047 | 0,062 | 0,055 | 0,071 | 0,044 | 0,043 | 0,043 | 0,043 | n.a.  | 0,063 | 0,072 | 0,069 | 0,069 | 0,068 | 0,104 | 0,093 | 0,097 | 0,065 | 0,062 | 0,087 | 0,070 | 0,102 | 0,101 | 0,113 | (5)            |      |
| (6) <i>Lecanicillium uredinophilum</i> QHLA                         | 0,018 | 0,018 | 0,018 | n.a.  | 0,023 |       | 0,000 | 0,077 | 0,075 | 0,073 | 0,063 | 0,061 | 0,064 | 0,064 | n.a.  | 0,070 | 0,075 | 0,079 | 0,078 | 0,078 | 0,108 | 0,104 | 0,109 | 0,079 | 0,076 | 0,097 | 0,083 | 0,113 | 0,089 | 0,115 | (6)            |      |
| (7) " <i>Lecanicillium</i> sp."/" <i>L. zaquensis</i> " HMAS 246917 | 0,015 | 0,015 | 0,015 | n.a.  | 0,017 | 0,000 |       | 0,050 | 0,018 | 0,041 | 0,033 | 0,030 | 0,034 | 0,036 | n.a.  | 0,033 | 0,043 | 0,042 | 0,044 | 0,041 | 0,063 | 0,052 | 0,069 | 0,038 | 0,019 | 0,044 | 0,048 | 0,059 | 0,083 | 0,087 | (7)            |      |
| (8) <i>Akanthomyces lecanii</i> TYPE CBS 101247                     | 0,022 | 0,022 | 0,022 | n.a.  | 0,025 | 0,026 | 0,027 |       | 0,021 | 0,063 | 0,047 | 0,046 | 0,049 | 0,050 | n.a.  | 0,063 | 0,069 | 0,068 | 0,069 | 0,067 | 0,105 | 0,098 | 0,107 | 0,067 | 0,057 | 0,094 | 0,070 | 0,102 | 0,092 | 0,107 | (8)            |      |
| (9) <i>Akanthomyces sabanensis</i> TYPE ANDES-F 1024                | 0,023 | 0,023 | 0,023 | n.a.  | 0,026 | 0,018 | 0,023 | 0,007 |       | 0,061 | 0,040 | 0,041 | 0,042 | 0,041 | n.a.  | 0,055 | 0,056 | 0,059 | 0,062 | 0,058 | 0,093 | 0,086 | 0,089 | 0,055 | 0,049 | 0,086 | 0,058 | 0,097 | 0,093 | 0,095 | (9)            |      |
| (10) <i>Akanthomyces dipterigenus</i> TYPE CBS 126.27               | 0,021 | 0,021 | 0,021 | n.a.  | 0,023 | 0,032 | 0,019 | 0,027 | 0,023 |       | 0,055 | 0,054 | 0,055 | 0,056 | n.a.  | 0,064 | 0,071 | 0,070 | 0,071 | 0,068 | 0,103 | 0,096 | 0,095 | 0,073 | 0,064 | 0,093 | 0,082 | 0,101 | 0,097 | 0,108 | (10)           |      |
| (11) <i>Akanthomyces attenuatus</i> TYPE CBS 170.76                 | 0,017 | 0,017 | 0,017 | n.a.  | 0,017 | 0,032 | 0,015 | 0,031 | 0,028 | 0,017 |       | 0,002 | 0,005 | 0,007 | n.a.  | 0,047 | 0,056 | 0,057 | 0,055 | 0,055 | 0,095 | 0,086 | 0,093 | 0,055 | 0,041 | 0,084 | 0,061 | 0,090 | 0,085 | 0,105 | (11)           |      |
| (12) <i>Akanthomyces muscarius</i> TYPE CBS 143.62                  | 0,017 | 0,017 | 0,017 | n.a.  | 0,017 | 0,032 | 0,015 | 0,031 | 0,028 | 0,017 | 0,000 |       | 0,004 | 0,006 | n.a.  | 0,046 | 0,055 | 0,056 | 0,054 | 0,054 | 0,094 | 0,084 | 0,091 | 0,054 | 0,042 | 0,084 | 0,059 | 0,089 | 0,083 | 0,105 | (12)           |      |
| (13) <i>Akanthomyces pissodis</i> BBC7                              | 0,017 | 0,017 | 0,017 | n.a.  | 0,017 | 0,032 | 0,015 | 0,031 | 0,028 | 0,017 | 0,000 | 0,000 |       | 0,008 | n.a.  | 0,046 | 0,056 | 0,056 | 0,055 | 0,055 | 0,095 | 0,086 | 0,093 | 0,055 | 0,043 | 0,085 | 0,060 | 0,091 | 0,086 | 0,107 | (13)           |      |
| (14) <i>Akanthomyces neocoleopterorum</i> TYPE GY11241              | 0,015 | 0,015 | 0,015 | n.a.  | 0,017 | 0,023 | 0,013 | 0,029 | 0,026 | 0,015 | 0,006 | 0,006 | 0,006 |       | n.a.  | 0,049 | 0,056 | 0,058 | 0,056 | 0,056 | 0,095 | 0,086 | 0,092 | 0,056 | 0,042 | 0,083 | 0,062 | 0,091 | 0,087 | 0,106 | (14)           |      |
| (15) <i>Akanthomyces lepidopterorum</i> SD05151                     | 0,015 | 0,015 | 0,015 | n.a.  | 0,017 | 0,023 | 0,013 | 0,029 | 0,026 | 0,015 | 0,006 | 0,006 | 0,006 | 0,000 |       | n.a.           | (15) |
| (16) <i>Akanthomyces araneicola</i> TYPE GY29011                    | 0,062 | 0,062 | 0,062 | n.a.  | 0,064 | 0,060 | 0,056 | 0,040 | 0,043 | 0,043 | 0,056 | 0,056 | 0,056 | 0,053 | 0,053 |       | 0,040 | 0,040 | 0,041 | 0,039 | 0,097 | 0,085 | 0,098 | 0,036 | 0,027 | 0,087 | 0,043 | 0,096 | 0,093 | 0,101 | (16)           |      |
| (17) <i>Akanthomyces araneogenum</i> GZUIF SN1                      | 0,060 | 0,060 | 0,060 | n.a.  | 0,062 | 0,046 | 0,058 | 0,040 | 0,045 | 0,051 | 0,060 | 0,060 | 0,060 | 0,055 | 0,055 | 0,045 |       | 0,011 | 0,010 | 0,010 | 0,099 | 0,094 | 0,100 | 0,046 | 0,032 | 0,091 | 0,052 | 0,104 | 0,101 | 0,108 | (17)           |      |
| (18) <i>Akanthomyces farinosa</i> TYPE CBS 541.81                   | 0,074 | 0,074 | 0,074 | n.a.  | 0,076 | 0,061 | 0,072 | 0,054 | 0,058 | 0,065 | 0,074 | 0,074 | 0,074 | 0,069 | 0,069 | 0,056 | 0,019 |       | 0,001 | 0,001 | 0,099 | 0,093 | 0,101 | 0,047 | 0,035 | 0,092 | 0,051 | 0,103 | 0,101 | 0,110 | (18)           |      |
| (19) <i>Akanthomyces coccidioperitheciatus</i> NHJ 6709             | 0,058 | 0,058 | 0,058 | n.a.  | 0,060 | 0,042 | 0,056 | 0,038 | 0,043 | 0,049 | 0,058 | 0,058 | 0,058 | 0,053 | 0,053 | 0,043 | 0,002 | 0,022 |       | 0,000 | 0,103 | 0,096 | 0,104 | 0,047 | 0,035 | 0,095 | 0,049 | 0,107 | 0,100 | 0,110 | (19)           |      |
| (20) <i>Akanthomyces kanyavimiae</i> TBRC 7242                      | 0,057 | 0,057 | 0,057 | n.a.  | 0,060 | 0,041 | 0,055 | 0,038 | 0,043 | 0,049 | 0,057 | 0,057 | 0,057 | 0,053 | 0,053 | 0,043 | 0,002 | 0,022 | 0,000 |       | 0,099 | 0,093 | 0,101 | 0,046 | 0,034 | 0,091 | 0,049 | 0,102 | 0,099 | 0,108 | (20)           |      |
| (21) <i>Akanthomyces noctuidarum</i> TYPE BCC36265                  | 0,090 | 0,090 | 0,090 | n.a.  | 0,093 | 0,107 | 0,084 | 0,065 | 0,075 | 0,088 | 0,090 | 0,090 | 0,090 | 0,090 | 0,082 | 0,084 | 0,098 | 0,084 | 0,084 |       | 0,069 | 0,075 | 0,101 | 0,093 | 0,057 | 0,113 | 0,078 | 0,128 | 0,130 |       | (21)           |      |
| (22) <i>Akanthomyces pyralidarum</i> TYPE BCC28816                  | 0,092 | 0,092 | 0,092 | n.a.  | 0,090 | 0,106 | 0,090 | 0,078 | 0,085 | 0,090 | 0,098 | 0,098 | 0,098 | 0,094 | 0,094 | 0,096 | 0,096 | 0,116 | 0,096 | 0,096 | 0,085 |       | 0,059 | 0,089 | 0,079 | 0,046 | 0,099 | 0,053 | 0,119 | 0,127 | (22)           |      |
| (23) <i>Akanthomyces tortricidarum</i> TYPE BCC72638                | 0,075 | 0,075 | 0,075 | n.a.  | 0,077 | 0,070 | 0,069 | 0,056 | 0,062 | 0,071 | 0,079 | 0,079 | 0,079 | 0,077 | 0,077 | 0,060 | 0,068 | 0,082 | 0,066 | 0,066 | 0,079 | 0,068 |       | 0,100 | 0,084 | 0,050 | 0,112 | 0,070 | 0,119 | 0,127 | (23)           |      |
| (24) <i>Akanthomyces sulphureus</i> TYPE TBRC 7248                  | 0,062 | 0,062 | 0,062 | n.a.  | 0,064 | 0,065 | 0,062 | 0,043 | 0,047 | 0,053 | 0,066 | 0,066 | 0,066 | 0,064 | 0,064 | 0,049 | 0,064 | 0,078 | 0,062 | 0,062 | 0,091 | 0,090 | 0,064 |       | 0,029 | 0,087 | 0,010 | 0,097 | 0,095 | 0,103 | (24)           |      |
| (25) <i>Akanthomyces thailandicus</i> TYPE TBRC 7245                | 0,072 | 0,072 | 0,072 | n.a.  | 0,075 | 0,060 | 0,075 | 0,058 | 0,057 | 0,064 | 0,077 | 0,077 | 0,077 | 0,072 | 0,072 | 0,047 | 0,045 | 0,058 | 0,043 | 0,042 | 0,097 | 0,090 | 0,066 | 0,058 |       | 0,085 | 0,032 | 0,091 | 0,097 | 0,097 | (25)           |      |
| (26) <i>Akanthomyces tuberculatus</i> OSC 111002                    | 0,049 | 0,049 | 0,049 | n.a.  | 0,052 | 0,060 | 0,047 | 0,052 | 0,051 | 0,060 | 0,056 | 0,056 | 0,056 | 0,054 | 0,054 | 0,081 | 0,083 | 0,097 | 0,081 | 0,081 | 0,103 | 0,089 | 0,075 | 0,086 | 0,092 |       | 0,100 | 0,055 | 0,116 | 0,114 | (26)           |      |
| (27) <i>Akanthomyces walteigamsii</i> TYPE TBRC 7252                | 0,055 | 0,055 | 0,055 | n.a.  | 0,058 | 0,055 | 0,053 | 0,036 | 0,036 | 0,043 | 0,055 | 0,055 | 0,055 | 0,053 | 0,053 | 0,047 | 0,055 | 0,069 | 0,053 | 0,053 | 0,090 | 0,085 | 0,064 | 0,015 | 0,055 | 0,077 |       | 0,108 | 0,096 | 0,109 | (27)           |      |
| (28) <i>Akanthomyces aculeatus</i> NTUCC 20-060                     | 0,079 | 0,079 | 0,079 | n.a.  | 0,075 | 0,069 | 0,079 | 0,076 | 0,072 | 0,083 | 0,083 | 0,083 | 0,083 | 0,083 | 0,083 | 0,090 | 0,087 | 0,105 | 0,085 | 0,085 | 0,101 | 0,075 | 0,072 | 0,094 | 0,091 | 0,082 | 0,083 |       | 0,122 | 0,135 | (28)           |      |
| (29) <i>Samsoniella alboaurantia</i> TYPE CBS 240.32                | 0,052 | 0,052 | 0,052 | n.a.  | 0,050 | 0,056 | 0,041 | 0,056 | 0,056 | 0,052 | 0,049 | 0,049 | 0,049 | 0,043 | 0,043 | 0,086 | 0,079 | 0,087 | 0,082 | 0,082 | 0,108 | 0,110 | 0,090 | 0,088 | 0,097 | 0,088 | 0,079 | 0,112 |       | 0,108 | (29)           |      |
| (30) <i>Beauveria bassiana</i> TYPE ARSEF 1564                      | 0,065 | 0,065 | 0,065 | n.a.  | 0,063 | 0,071 | 0,056 | 0,044 | 0,051 | 0,065 | 0,065 | 0,065 | 0,065 | 0,067 | 0,067 | 0,074 | 0,082 | 0,095 | 0,080 | 0,080 | 0,100 | 0,102 | 0,082 | 0,074 | 0,091 | 0,085 | 0,060 | 0,098 | 0,071 |       | (30)           |      |
| ITS                                                                 | (1)   | (2)   | (3)   | (4)   | (5)   | (6)   | (7)   | (8)   | (9)   | (10)  | (11)  | (12)  | (13)  | (14)  | (15)  | (16)  | (17)  | (18)  | (19)  | (20)  | (21)  | (22)  | (23)  | (24)  | (25)  | (26)  | (27)  | (28)  | (29)  | (30)  |                |      |
| n.a. = sequence data not available                                  |       |       |       |       |       |       |       |       |       |       |       |       |       |       |       |       |       |       |       |       |       |       |       |       |       |       |       |       |       |       |                |      |

n.a. = sequence data not available
